# Supplementary material
Source: PubMed Central journal article supplement (PMC5330619)
Supplement: NIHMS843012-supplement-supplement_1.pdf [file NIHMS843012-supplement-supplement_1.pdf]

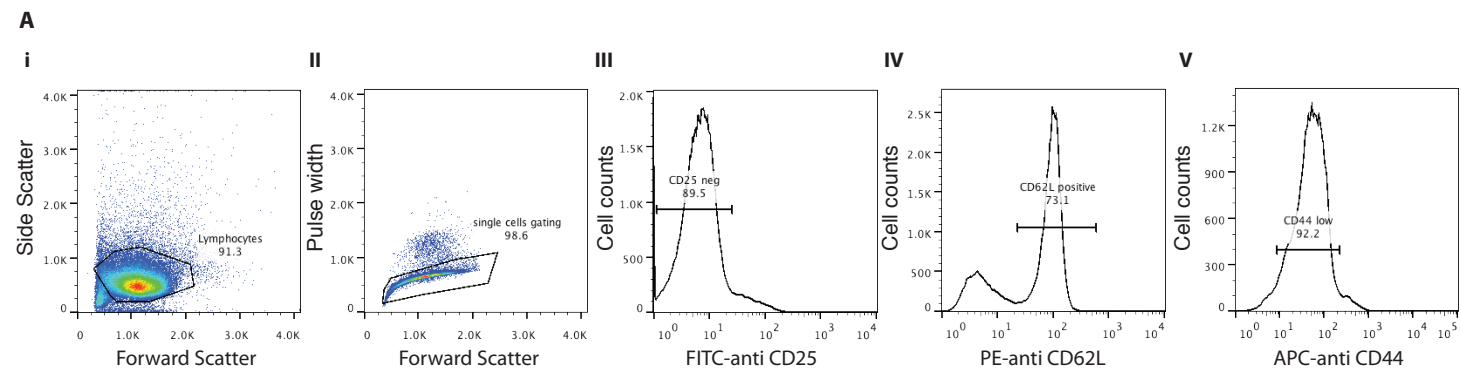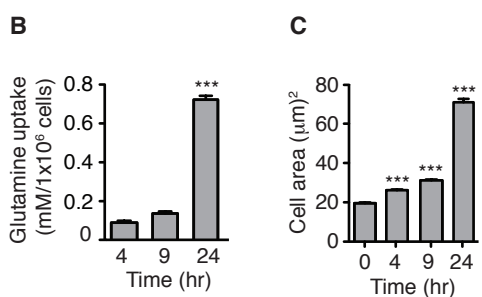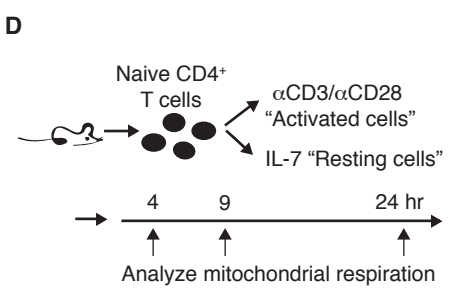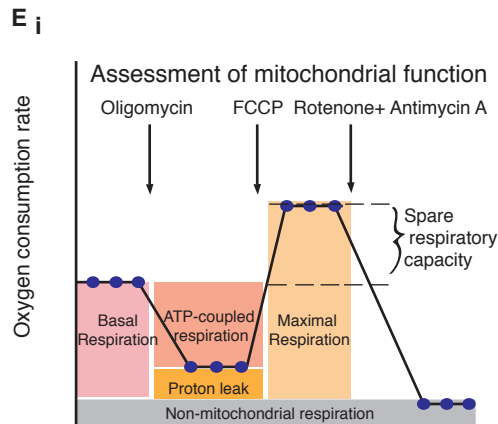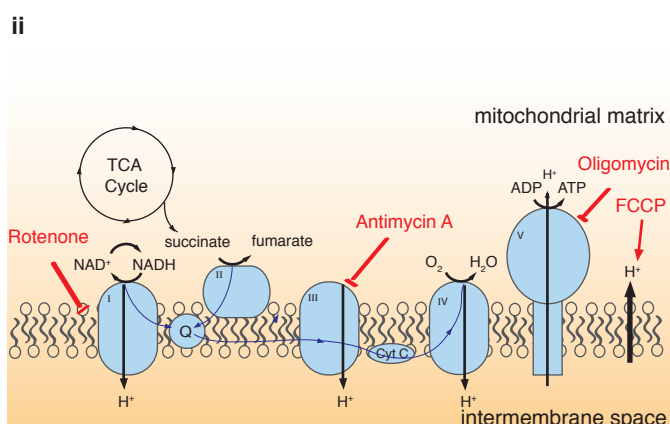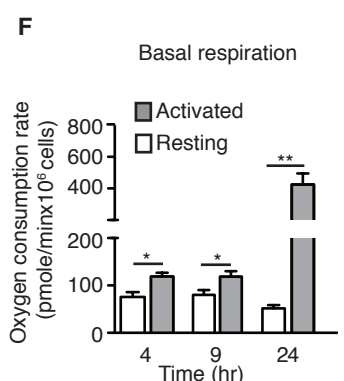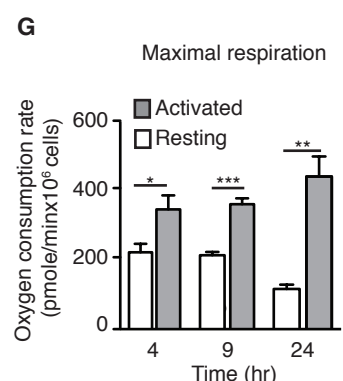

Figure S1, related to Figure 1

**A**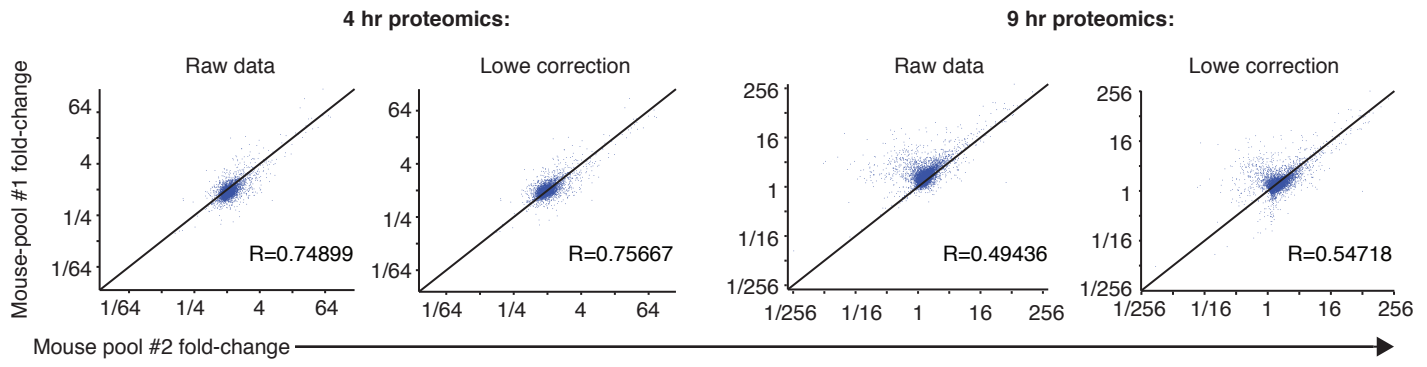**B**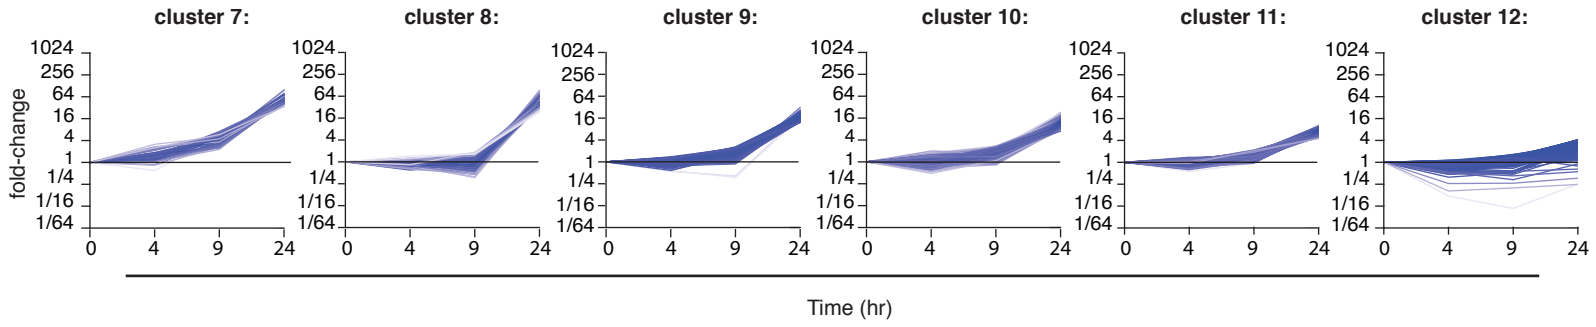

Figure S2, related to Figure 2

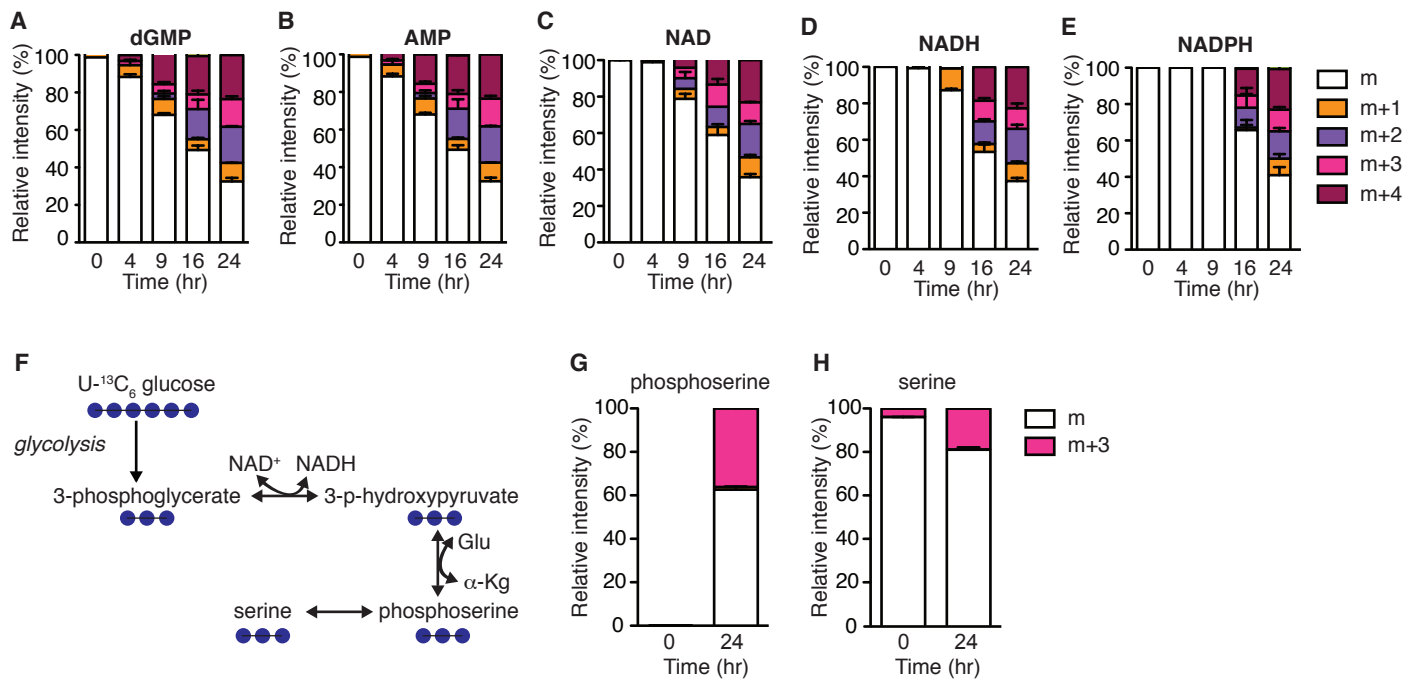

Figure S3, related to Figure 5

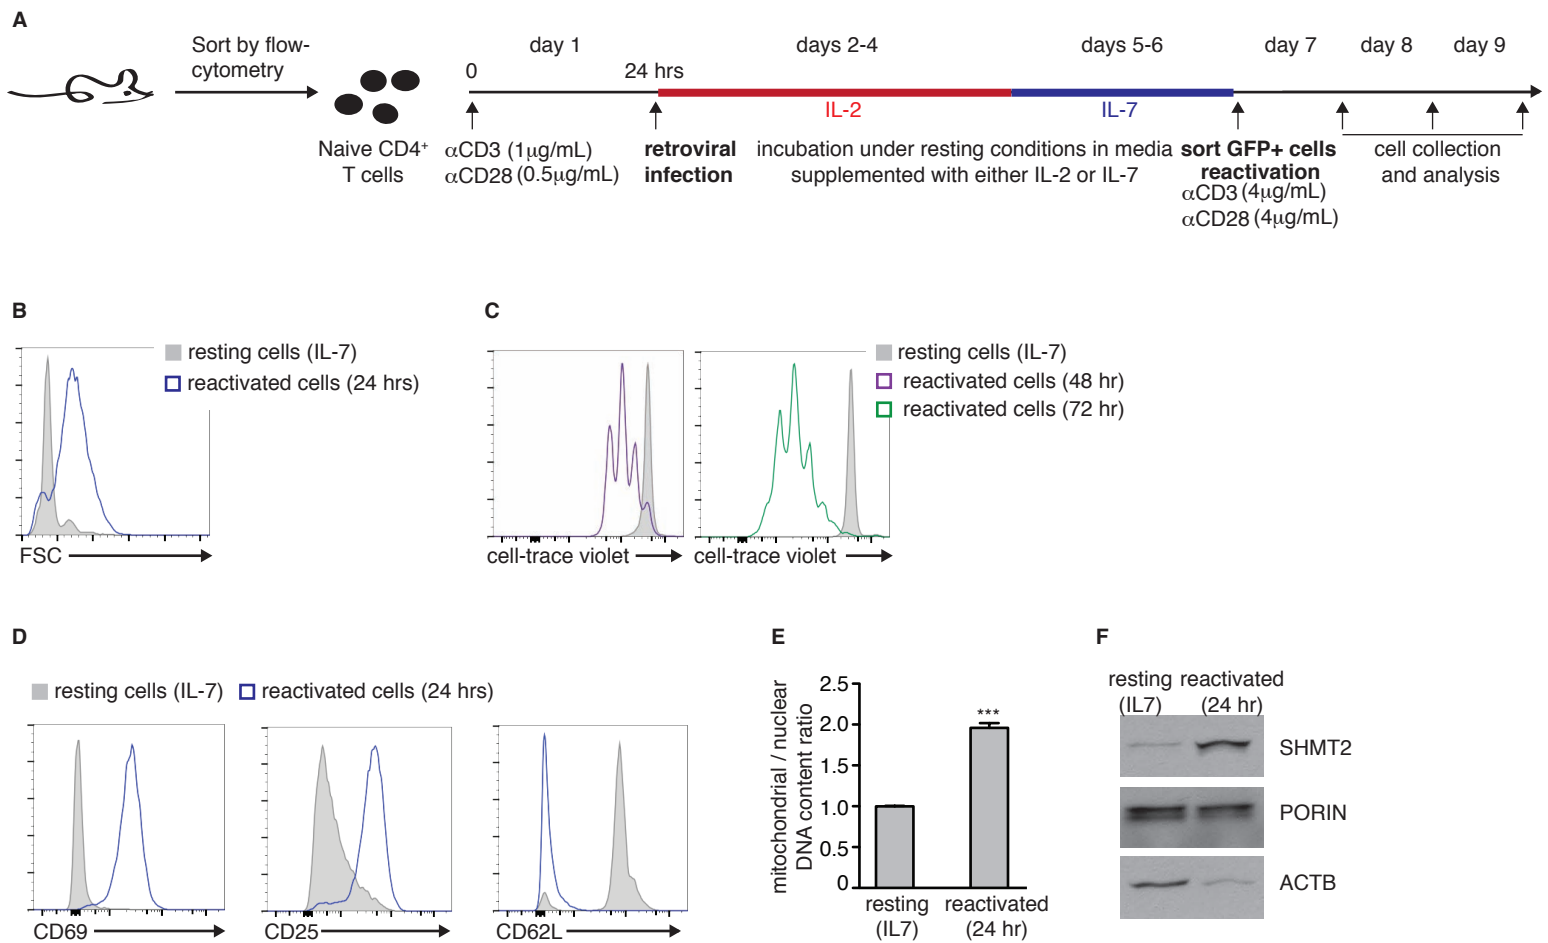

Figure S4, related to Figure 6

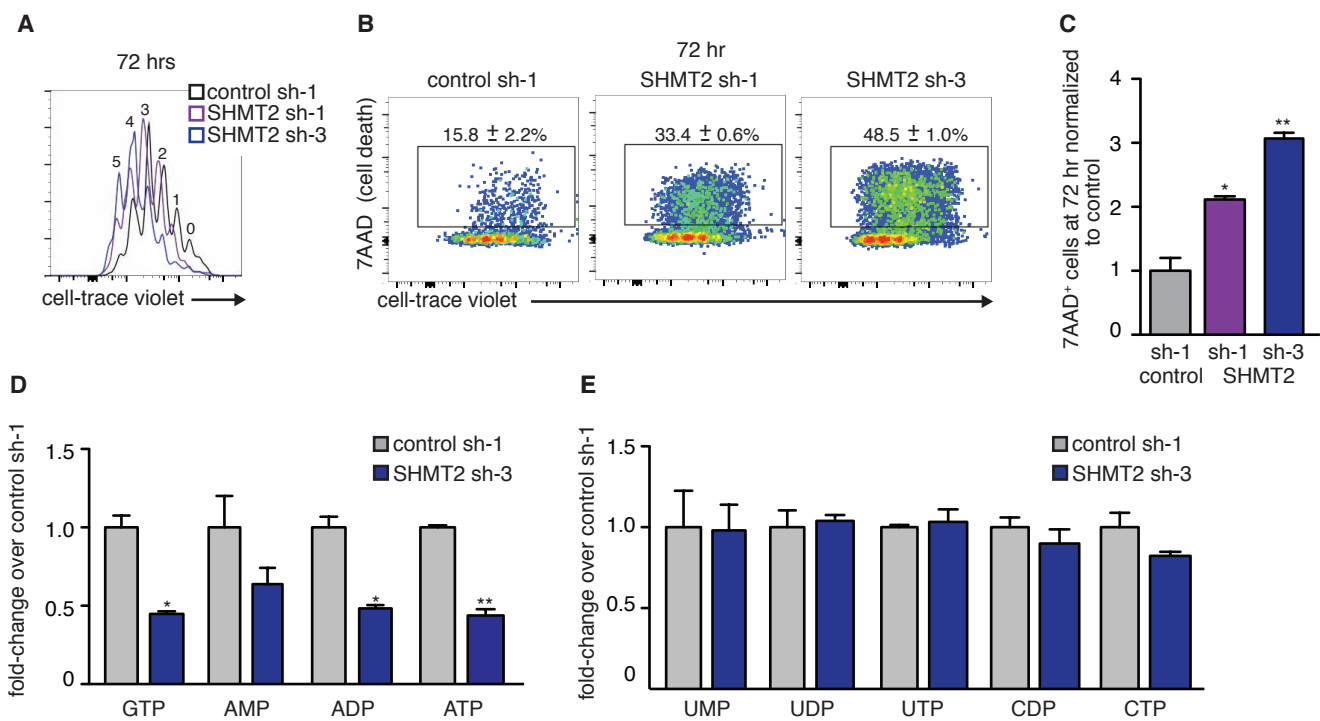

Figure S5, related to Figure 6
